# Supplementary material for: A narrative review of multiple endocrine neoplasia syndromes: genetics, clinical features, imaging findings, and diagnosis
Source: PubMed Central journal article supplement — Ann Transl Med. 2021 Jun;9(11):944. doi: 10.21037/atm-21-1165 (PMC8263874; doi:10.21037/atm-21-1165), 2021-06
Supplement: atm-09-11-944-prf.pdf [file atm-09-11-944-prf.pdf]

1 **Peer Review File**

2  
3 **Article information:** <http://dx.doi.org/10.21037/atm-21-1165>

4  
5 **Reviewer Comments**

6 **Comment 1:**

7 There are some style/english issues (for example "...should be tested for the following  
8 items: serum gastrin, fasting blood glucose..." - is gastrin or glucose an item?) or  
9 examples of inconsistency ("Pancreatic neuroendocrine tumors occur in 30%-80% of  
10 patients with MEN1 and are mostly multifocal, usually on the pancreas and duodenum -  
11 so do authors refer to Pancreatic NET or Duodenal NET?" or "Family diagnosis: The  
12 patient meets the clinical diagnostic criteria, and the patient has a first-degree  
13 relative ...who has a tumor related to MEN1" - if patient meets the first criterium then  
14 why seek for other? This criterium needs only one of the typical tumor and first-degree  
15 relative with MEN1.

16 **Reply 1:**

17 Thanks for your comment. We have revised the English issues according to your  
18 comments (for example "Pancreatic neuroendocrine tumors suspected to be MEN1-  
19 related should be tested for the following items: serum gastrin, fasting blood glucose..."  
20 has been revised as "Gastro-entero-pancreatic endocrine tumors suspected to be MEN1-  
21 related should be tested according to the following biochemical screening program:  
22 serum gastrin, fasting blood glucose...")(see [Page 12, line 227-229](#)).

23 The inconsistency that "Pancreatic neuroendocrine tumors occur in 30%-80% of  
24 patients with MEN1 and are mostly multifocal, usually on the pancreas and duodenum"  
25 has been revised as "Gastro-entero-pancreatic endocrine tumors occur in 30–80% of  
26 patients with MEN1 and are mostly multifocal, usually on the pancreas and duodenum"  
27 ([see Page 11, line 206-207](#)).

28 The definition of "Family diagnosis" refers to previous literature (Thakker RV,  
29 Newey PJ, Walls GV, et al. Clinical practice guidelines for multiple endocrine neoplasia  
30 type 1 (MEN1). J Clin Endocrinol Metab 2012;97:2990-3011). The diagnosis of MEN1  
31 can be divided into three types: clinical diagnosis, family diagnosis and genetic  
32 diagnosis. Patients who meet any of the following three diagnostic criteria can be

33 diagnosed with MEN1. Clinical diagnosis: The patient has two or more of the three  
34 main tumors (parathyroid tumor, pituitary tumor, gastro-entero-pancreatic endocrine  
35 tumor). Family diagnosis: The patient meets the clinical diagnostic criteria, and the  
36 patient has a first-degree relative who has one of those three tumors. Both clinical  
37 diagnosis and family diagnosis belong to MEN1. Genetic diagnosis: Genetic testing of  
38 the patient found a mutation in the MEN1 gene.

39 **Changes in the text:** see Page 5/line 86, Page 9/line 173, Page 10/line 196, Page 11/line  
40 206-207, Page 12/line 227-229, Page 12/line 242, Page 13/line 246, Page 14/line 268,  
41 Page 19/line 365, Page 19/line 371, Page 19/line 379-380, Page 23/line 453

42

43 **Comment 2:**

44 Authors stated in the abstract that early diagnosis is important and have impact on  
45 management. Therefore it would be interesting to write more about genetic diagnostics  
46 in MEN2 (essential impact of codons on management) or phenocopies and difficulties  
47 with regard to ambiguous cases (typical phenotype and no mutation).

48 **Reply 2:**

49 We thank you for the comment. We have added more about hierarchical gene  
50 management of MEN2 in the revised genetics section of our article(see [Page 8-9, line](#)  
51 [148-157](#)). Hierarchical gene management of MEN2-related MTC is of great help to  
52 improve the prognosis. According to the RET mutation site, the American thyroid  
53 Association divided the disease risk into four levels, from the lowest A to the highest D.  
54 The codons involved are as follows:  
55 A:768,790,791,804,649,891;B:609,611,618,620,630,631;C:634;D:918,883. Patients  
56 with grade A risk are recommended for total thyroidectomy after age 5 or when CT  
57 results are positive. Patients with grade B or C risk should have total thyroidectomy  
58 before age 5. Patients with grade D risk should have surgery as early as the first year of  
59 life.

60 For patients with typical phenotypes of MEN2 but no RET gene mutation, we make a  
61 discussion in the article(see [Page 23, line 437-445](#)). For patients with typical  
62 phenotypes of MEN2 but no RET gene mutation, we can make the clinical diagnosis of  
63 MNE2 when the patients meet the clinical diagnostic criteria of MEN2, which we have  
64 described in the diagnosis section of the article(see [Page 20, line 385-399](#)). As for these  
65 patients, their high-risk relatives should be screened regularly. Screening for MTC  
66 includes neck ultrasound graphy, basal and / or irritant calcitonin determination.

67 Pheochromocytoma is screened by measuring plasma or 24-hour urine concentrations of  
68 catecholamines and their metabolites. In addition, periodic tumor tests should be  
69 performed in patients who are suspected of MEN2 but do not meet clinical or genetic  
70 diagnostic criteria.

71 **Changes in the text:** see Page 8-9/line 148-157, see Page 23/line 437-445, see Page  
72 20/line 385-399

73

74

75 **Comment 3:** Moreover, it needs to be emphasised that MEN need to be differentiated  
76 with sporadic tumors, not VHL or NF1 which are very rare and pancreatic NET are even  
77 rarer within these syndromes.

78 **Reply 3:** Thanks for your comment. We have emphasised that MEN need to be  
79 differentiated with sporadic tumors in the revised discussion section, and we have  
80 pointed that some features of suspicious cases should arouse the vigilance of  
81 clinicians(see [Page 22-23, line 413-435](#)). For MEN1, it often has the following  
82 characteristics. Parathyroid hyperplasia or adenoma associated with MEN1 occurs  
83 earlier than sporadic case and often occurs in multiple glands. The onset age of gastro-  
84 entero-pancreatic neuroendocrine tumors related to MEN1 is earlier compared to  
85 sporadic cases. Gastro-entero-pancreatic neuroendocrine tumors usually manifest as  
86 multifocal and small lesions. For MEN2, it often has the following characteristics. 25%  
87 of MTC patients are associated with MEN2, so all MTC and C cell hyperplasia patients  
88 should be tested for RET gene. Bilateral adrenal pheochromocytoma is often associated  
89 with familial hereditary diseases and requires vigilance. Lichen amyloidosis on the back  
90 skin is a characteristic manifestation of MEN2A. The special manifestations (Marfanoid  
91 habitus, mucosal neuromas, protruding lips, gastrointestinal ganglion neuroma) of  
92 MEN2B is an important clue for early diagnosis of MEN2B.

93 **Changes in the text:** see Page 22-23/line 413-435

94

95 **Comment 4:** Both authors come from Gastrology and Radiology departments so I  
96 would expect to get more information about novel diagnostics and typical findings of  
97 MEN-related lesions.

98 **Reply 4:** Thanks for your comment. The novel diagnostics and typical findings related to  
99 MEN are a summary of key points, which can further deepen radiologists' and clinicians'

100 understanding and memory of the disease, identify suspicious patients quickly and  
101 sensitively in future work, make correct diagnosis quickly and improve patients'  
102 prognosis as much as possible. According to the characteristics of each type of MEN,  
103 some memory methods can be summarized, which we have highlighted in the conclusion  
104 section(see [Page 23-24, line 450-459](#)). MEN1 mainly involves parathyroid tumors,  
105 gastro-entero-pancreatic endocrine tumors, and pituitary tumors, which can be  
106 remembered as "2P1G". The clinical phenotype of MEN4 is similar to that of MEN1, but  
107 the genes involved are different. Thus far, there have been few studies on MEN4. MEN2A  
108 mainly involves MTC, pheochromocytoma, and parathyroid tumors, which can be simply  
109 remembered as "2P1M". MEN2B mainly manifests as MTC, pheochromocytoma,  
110 Marfanoid habitus, and mucosal neuroma, which can be remembered as "1P3M".

111 **Changes in the text:** see Page 23-24/line 450-459
